# Supplementary material for: Synthesis of 6-substituted 2-phenacylpyridines from 2-(phenylethynyl)pyridine via isoxazolo[2,3-a]pyridinium salt
Source: Royal Society of Chemistry journal article supplement (doi:10.1039/c6ob01942k), 2016-01-01

## Supporting Information

### Synthesis of 6-Substituted 2-phenacylpyridines from 2-Phenylethynylpyridine *via* Isoxazolo[2,3-*a*]pyridinium Salt

Song T. Le,<sup>a</sup> Toshiki Fujimoto,<sup>b</sup> Haruyasu Asahara\*<sup>b,c</sup> and Nagatoshi Nishiwaki\*<sup>b,c</sup>

<sup>a</sup> Faculty of Applied Sciences, Ton Duc Thang University, 19 Nguyen Huu Tho Street, Tan Phong Ward, District 7, Ho Chi Minh City, 70000, Vietnam.

<sup>b</sup> School of Environmental Science and Technology, Kochi University of Technology, Tosayamada, Kami, Kochi, 782-8502, Japan

<sup>c</sup> Research Center for Material Science and Engineering, Kochi University of Technology, Tosayamada, Kami, Kochi, 782-8502, Japan

E-mail: nishiwaki.nagatoshi@kochi-tech.ac.jp

#### Table of Contents

|                                                          |                                        |        |
|----------------------------------------------------------|----------------------------------------|--------|
| 2-Benzoylmethyl-6-(2-propoxy)pyridine (7a)               | <sup>1</sup> H and <sup>13</sup> C NMR | ESI-2  |
| 2-Benzoylmethyl-6-methoxypyridine (7b)                   | <sup>1</sup> H and <sup>13</sup> C NMR | ESI-3  |
| 2-Benzoylmethyl-6-ethoxypyridine (7c)                    | <sup>1</sup> H and <sup>13</sup> C NMR | ESI-4  |
| 2-Benzoylmethyl-6- <i>tert</i> -butoxypyridine (7d)      | <sup>1</sup> H and <sup>13</sup> C NMR | ESI-5  |
| 2-Benzoylmethyl-6-benzyloxypyridine (7e)                 | <sup>1</sup> H and <sup>13</sup> C NMR | ESI-6  |
| 2-Benzoylmethyl-6-(2-phenylethoxy)pyridine (7f)          | <sup>1</sup> H and <sup>13</sup> C NMR | ESI-7  |
| 2-Benzoylmethyl-6-(2-hydroxyethoxy)pyridine (7g)         | <sup>1</sup> H and <sup>13</sup> C NMR | ESI-8  |
| 2-Benzoylmethyl-6-(3-chloro-1-propoxy)pyridine (7h)      | <sup>1</sup> H and <sup>13</sup> C NMR | ESI-9  |
| 2-Benzoylmethyl-6-(2-propen-1-oxy)pyridine (7i)          | <sup>1</sup> H and <sup>13</sup> C NMR | ESI-10 |
| 2-Benzoylmethyl-6-(2-propynyloxy)pyridine (7j)           | <sup>1</sup> H and <sup>13</sup> C NMR | ESI-11 |
| 2-Benzoylmethyl-6-hydroxypyridine (7k)                   | <sup>1</sup> H and <sup>13</sup> C NMR | ESI-12 |
| 2-Methoxy-6-(2-oxo-1-hexyl)pyridine (7l)                 | <sup>1</sup> H and <sup>13</sup> C NMR | ESI-14 |
| 6-Benzoylmethyl-2-ethanoylaminopyridine (9a)             | <sup>1</sup> H and <sup>13</sup> C NMR | ESI-15 |
| 2-Benzoylmethyl-6-propanolaminopyridine (9b)             | <sup>1</sup> H and <sup>13</sup> C NMR | ESI-16 |
| 2-Benzoylmethyl-6-(2-methylpropanoyl)aminopyridine (9c)  | <sup>1</sup> H and <sup>13</sup> C NMR | ESI-17 |
| 2-Benzoylmethyl-6-propenoylaminopyridine (9d)            | <sup>1</sup> H and <sup>13</sup> C NMR | ESI-18 |
| 2-Benzoylmethyl-6-phenylethanoylaminopyridine (9e)       | <sup>1</sup> H and <sup>13</sup> C NMR | ESI-19 |
| 2-Benzoylmethyl-6-(4-chlorobenzoylamino)pyridine (9f)    | <sup>1</sup> H and <sup>13</sup> C NMR | ESI-20 |
| 6-Isopropoxy-2-(1,2-dioxo-2-phenylethyl)pyridine (11a)   | <sup>1</sup> H and <sup>13</sup> C NMR | ESI-21 |
| 6-Methoxy-2-(1,2-dioxo-2-phenylethyl)pyridine (11b)      | <sup>1</sup> H and <sup>13</sup> C NMR | ESI-22 |
| 6-Ethanoylamino-2-(1,2-dioxo-2-phenylethyl)pyridine (14) | <sup>1</sup> H and <sup>13</sup> C NMR | ESI-23 |

2-Benzoylmethyl-6-(2-propoxy)pyridine (7a) (CDCl<sub>3</sub>)

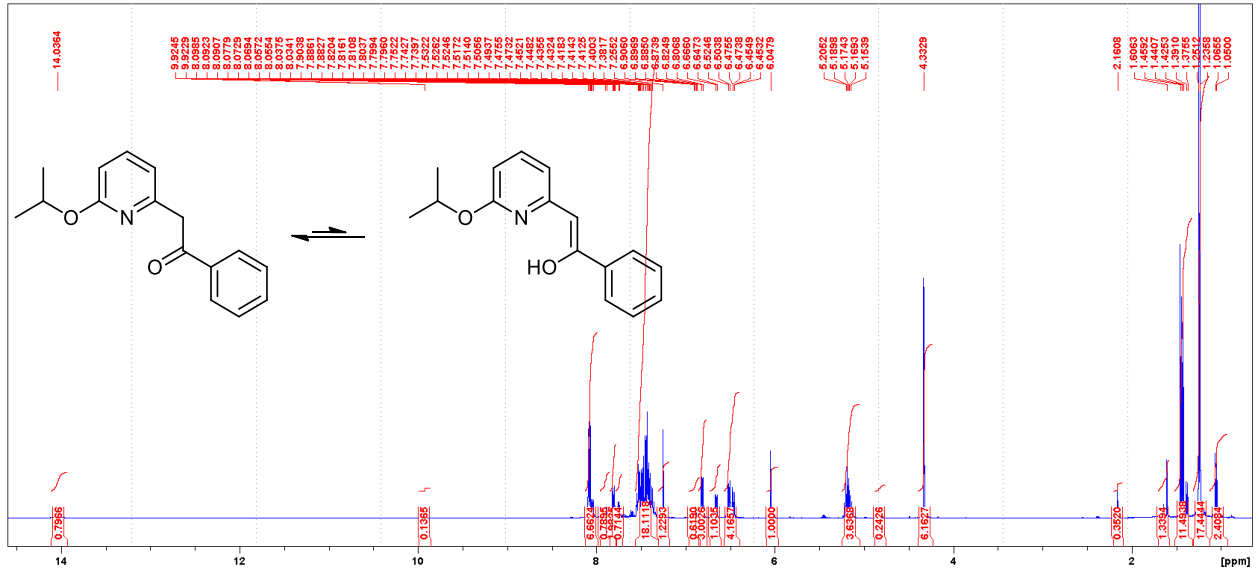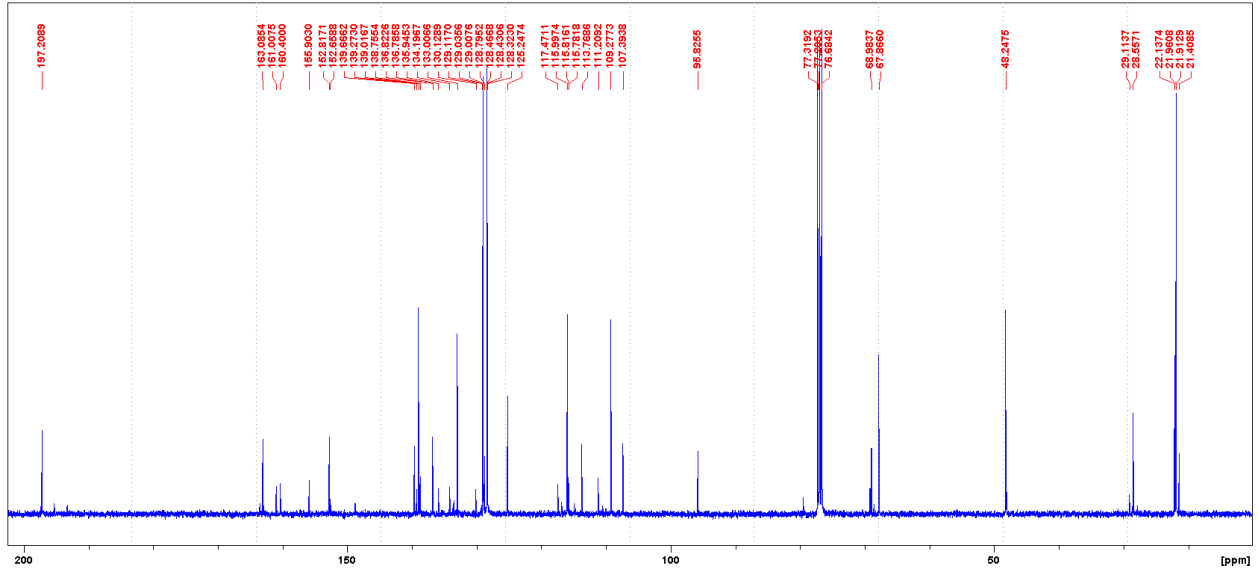

2- Benzoylmethyl-6-methoxypyridine (7b) (CDCl<sub>3</sub>)

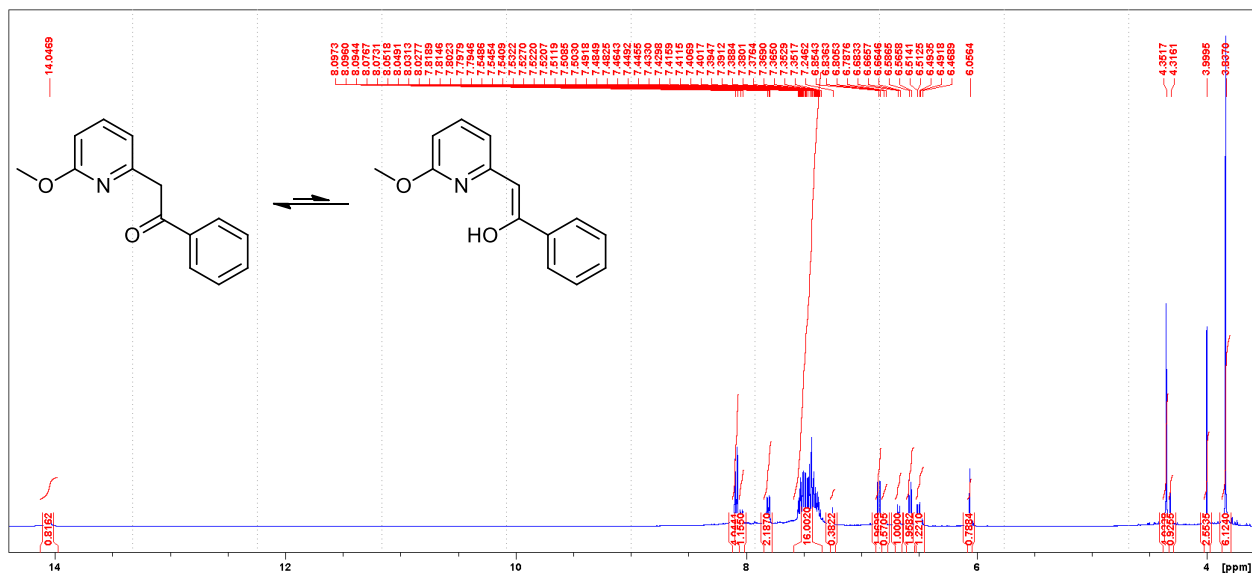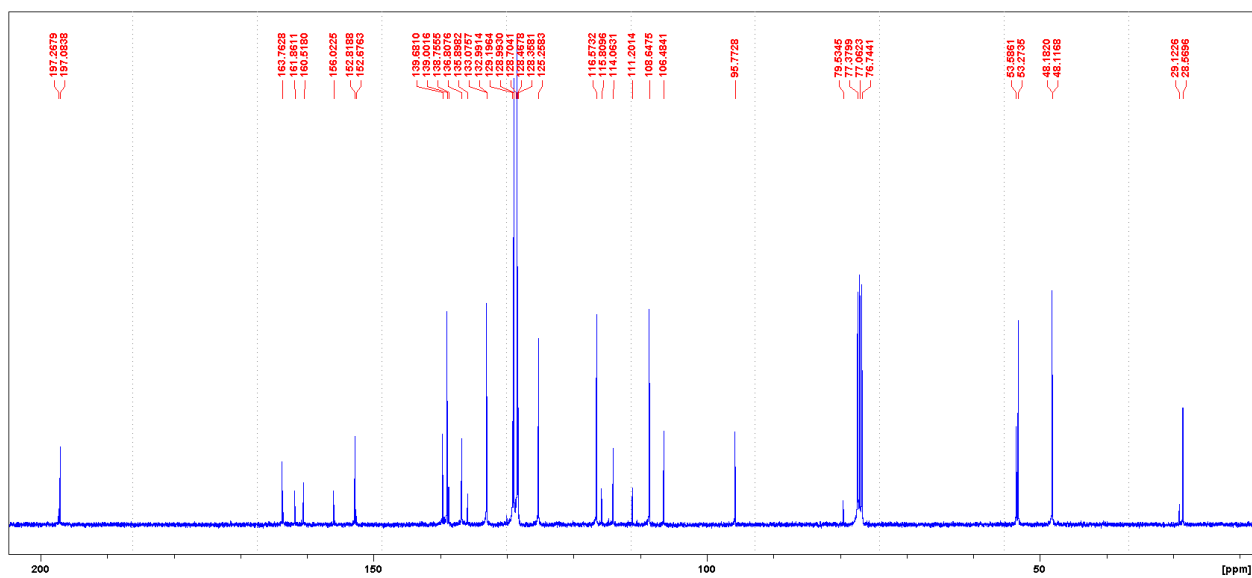

2-Benzoylmethyl-6-ethoxypyridine (7c) (CDCl<sub>3</sub>)

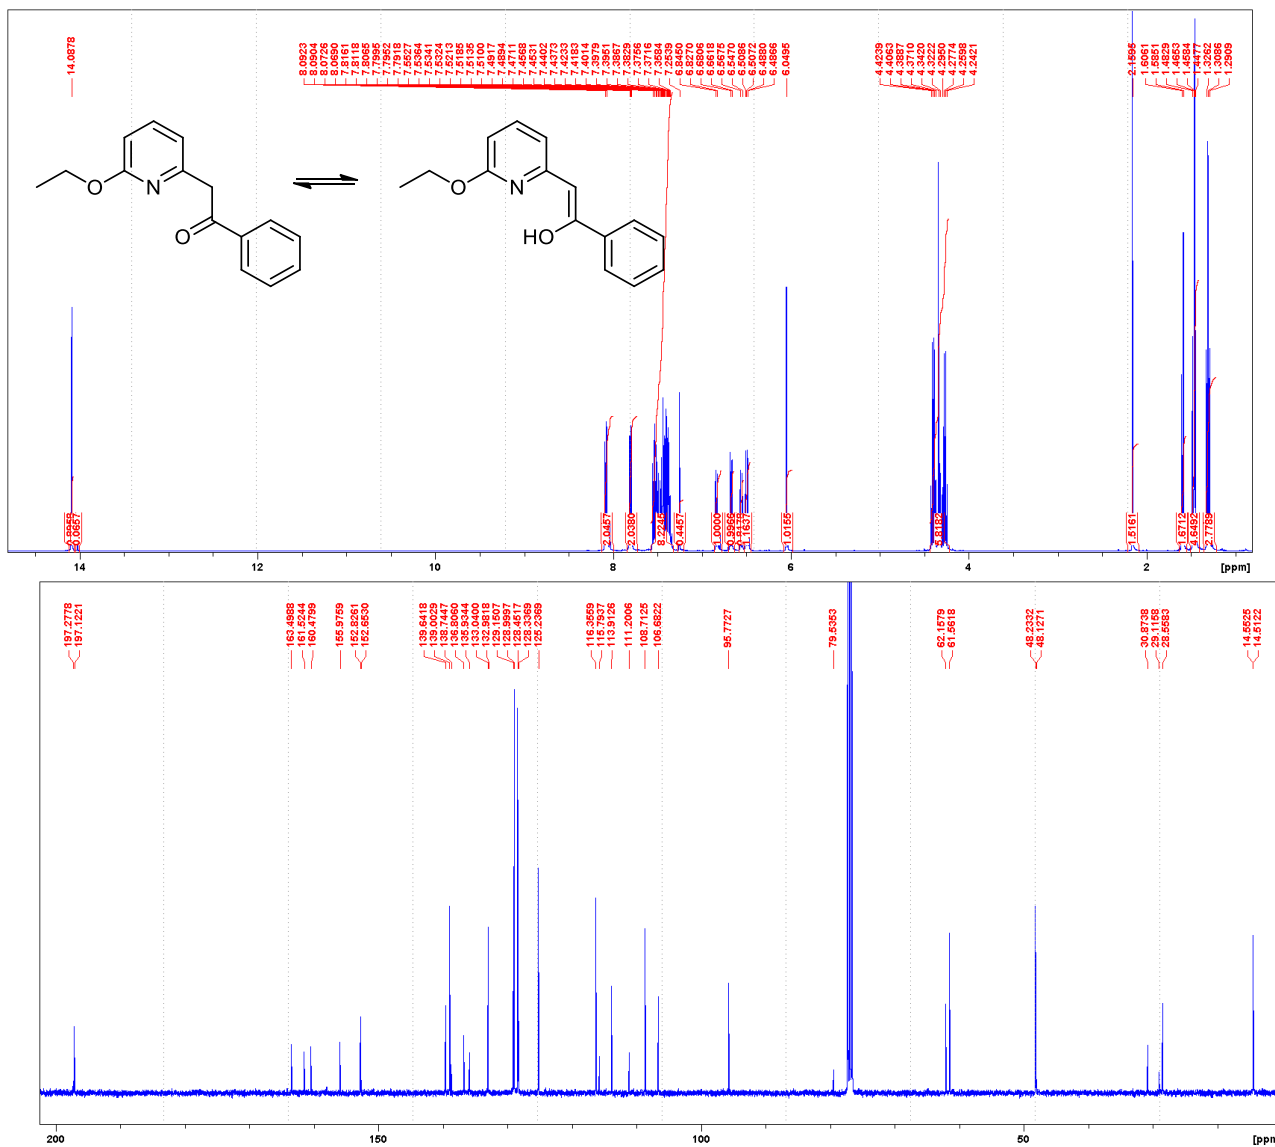

2-Benzoylmethyl-(6-*tert*-butoxy)pyridine (7d) (CDCl<sub>3</sub>)

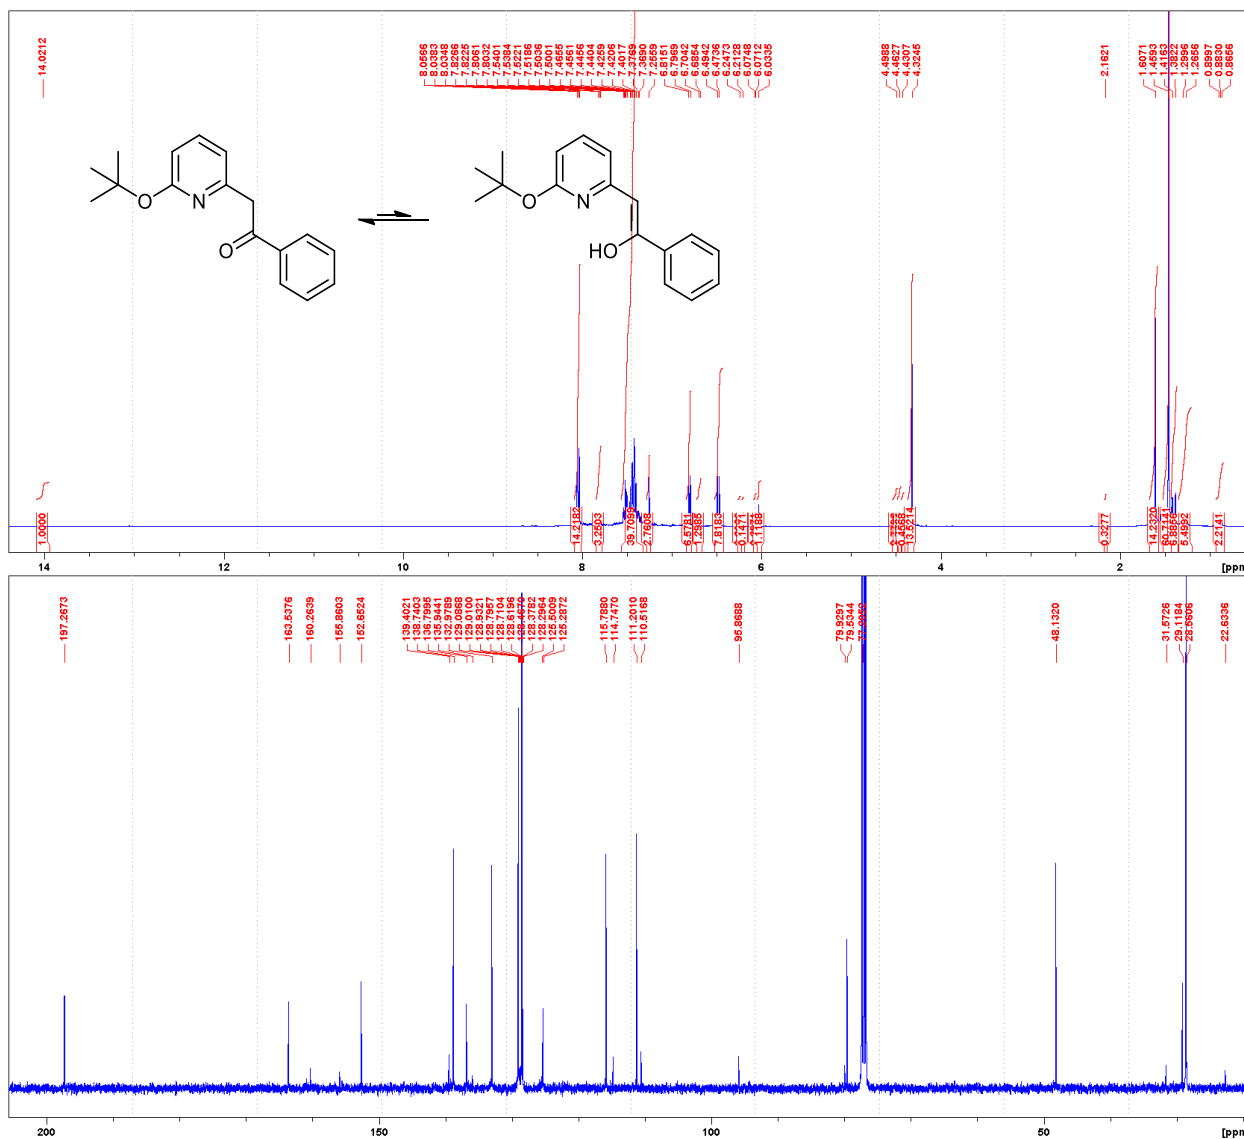

2-Benzoylmethyl-6-benzoyloxy pyridine (7e) (CDCl<sub>3</sub>)

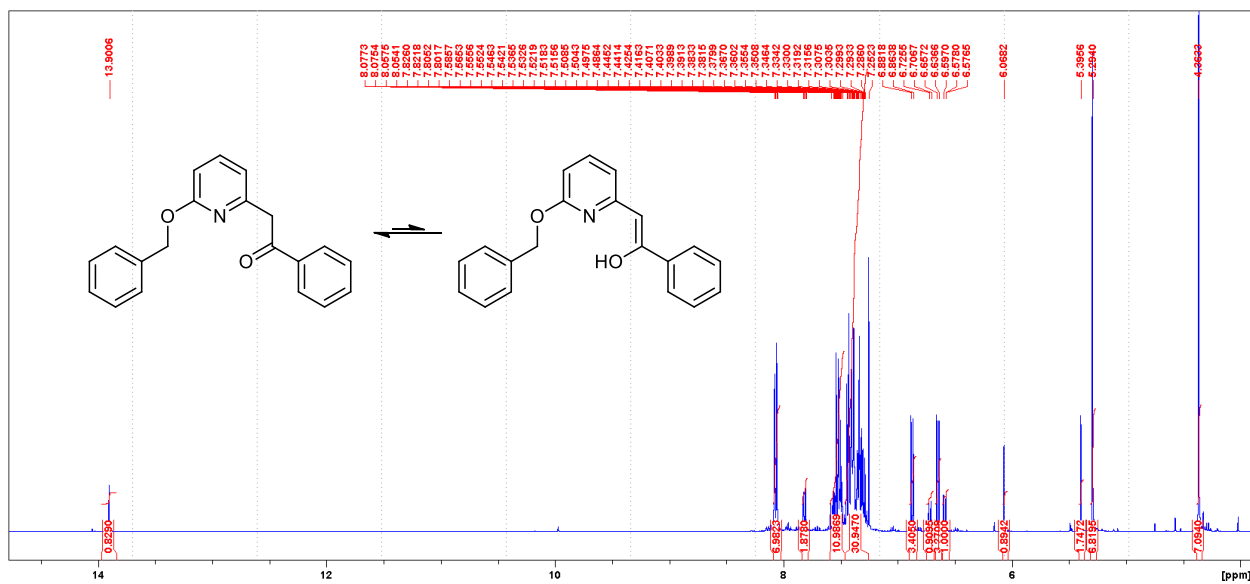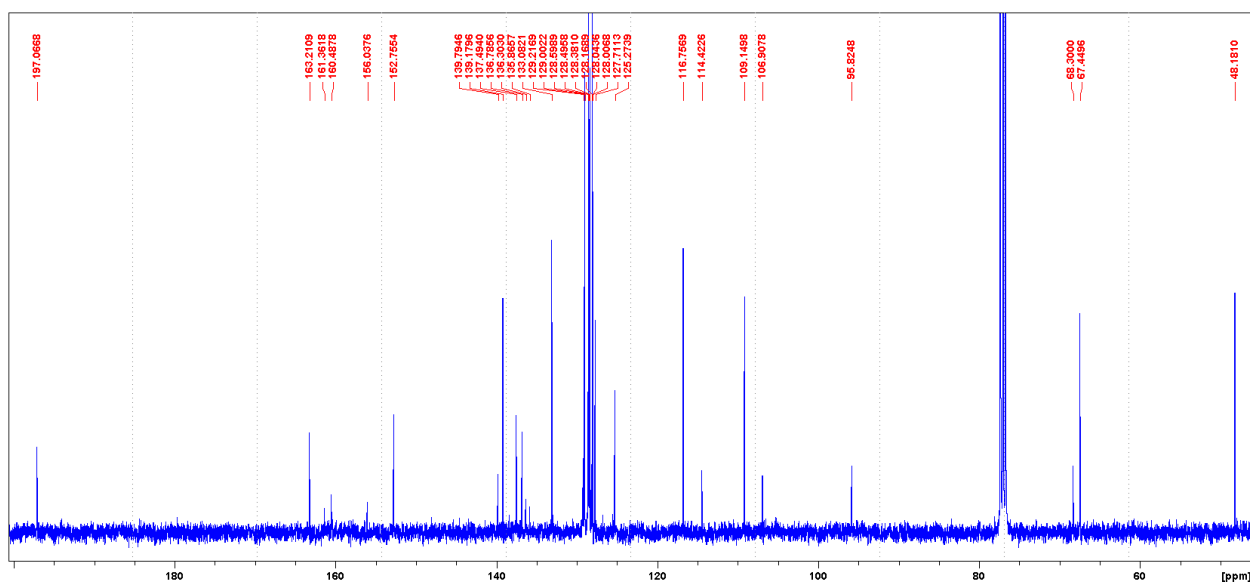

2-Benzoylmethyl-6-(2-phenylethoxy)pyridine (7f) (CDCl<sub>3</sub>)

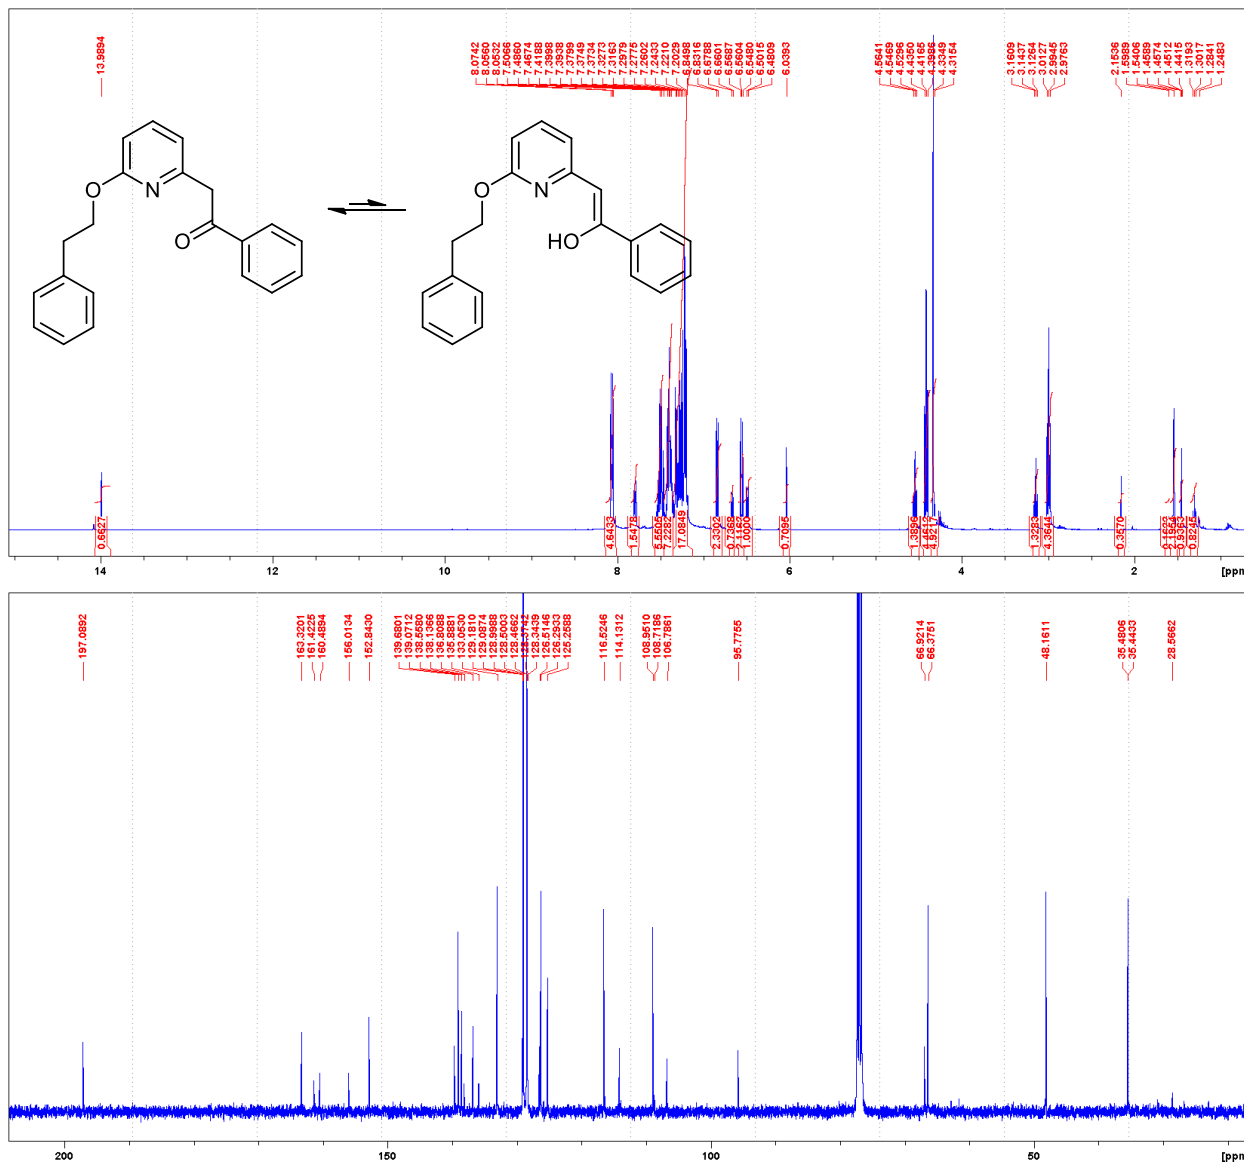

2-Benzoylmethyl-6-(2-hydroxyethoxy)pyridine (7g) (CDCl<sub>3</sub>)

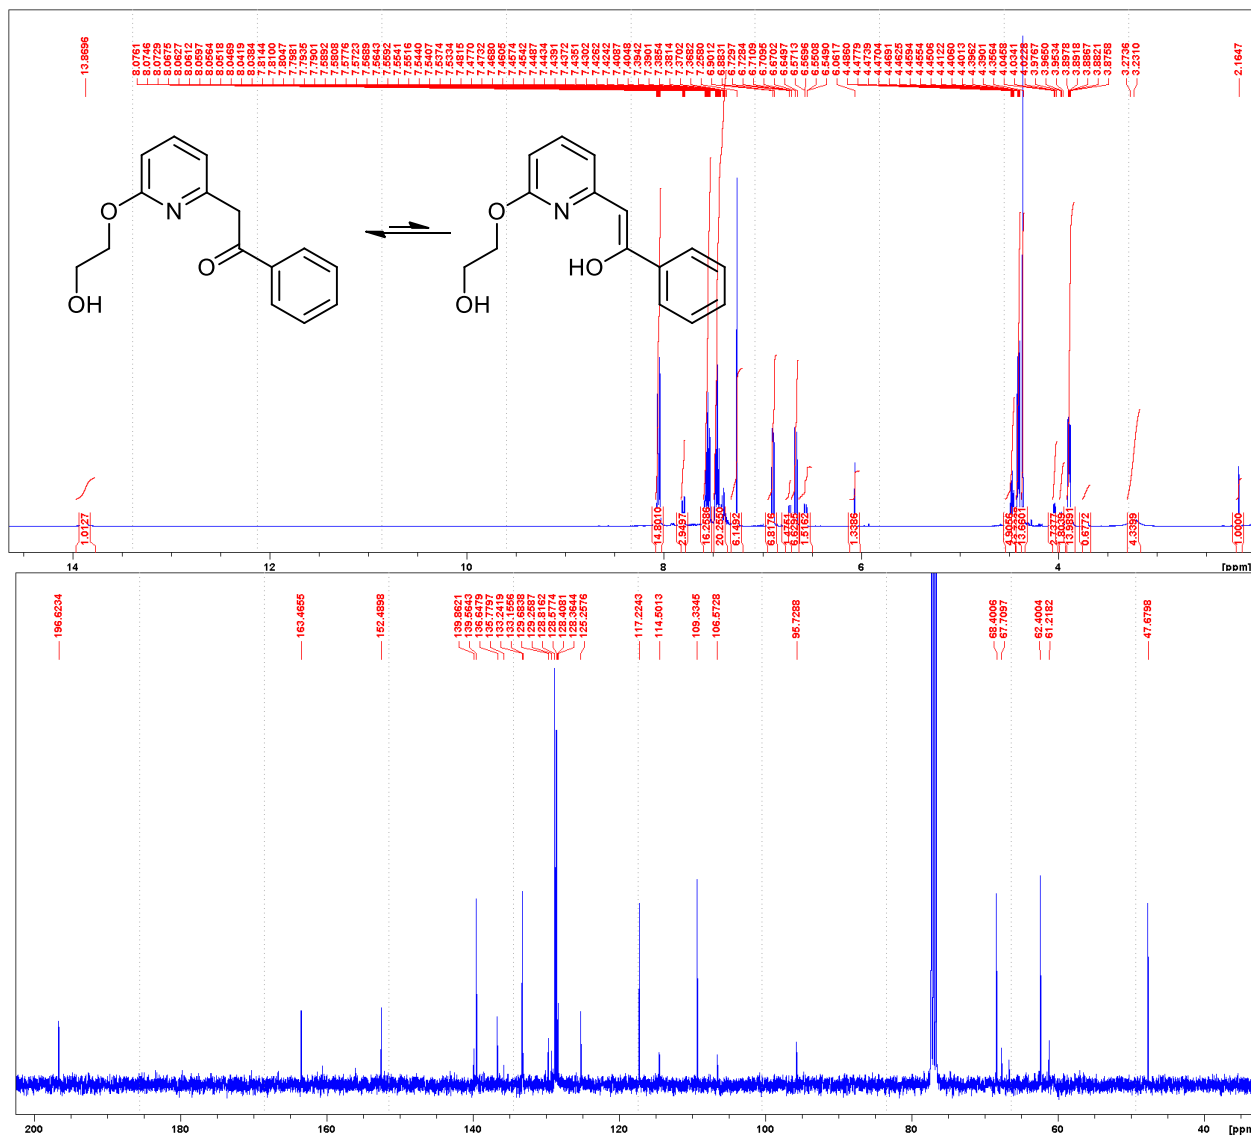





2-Benzoylmethyl-6-(2-propen-1-oxypyridine (7i) (CDCl<sub>3</sub>)

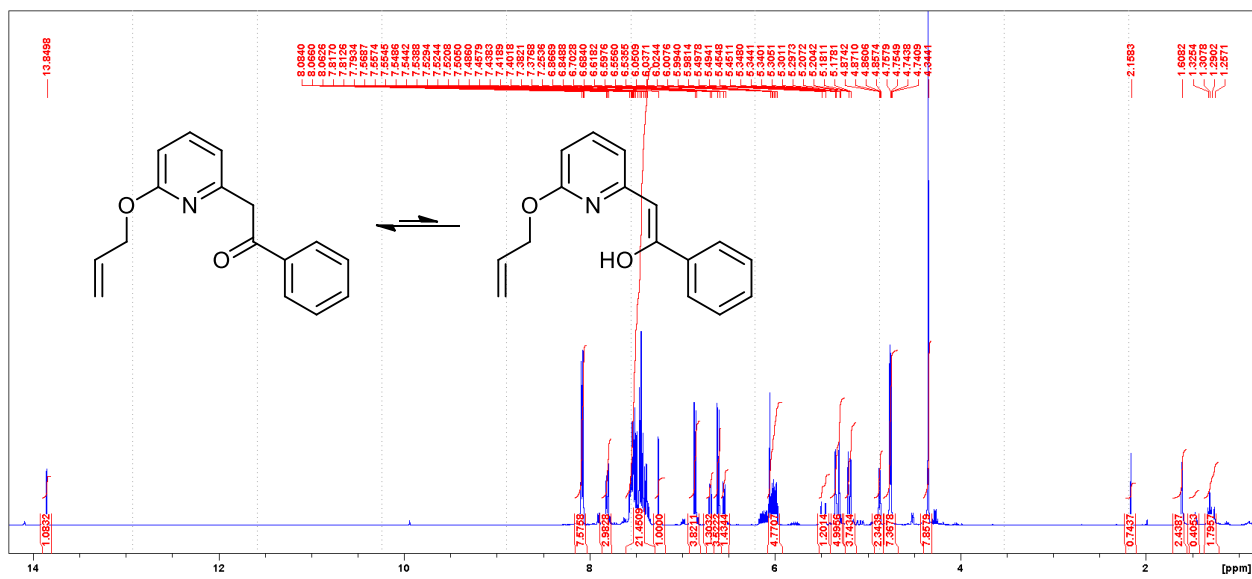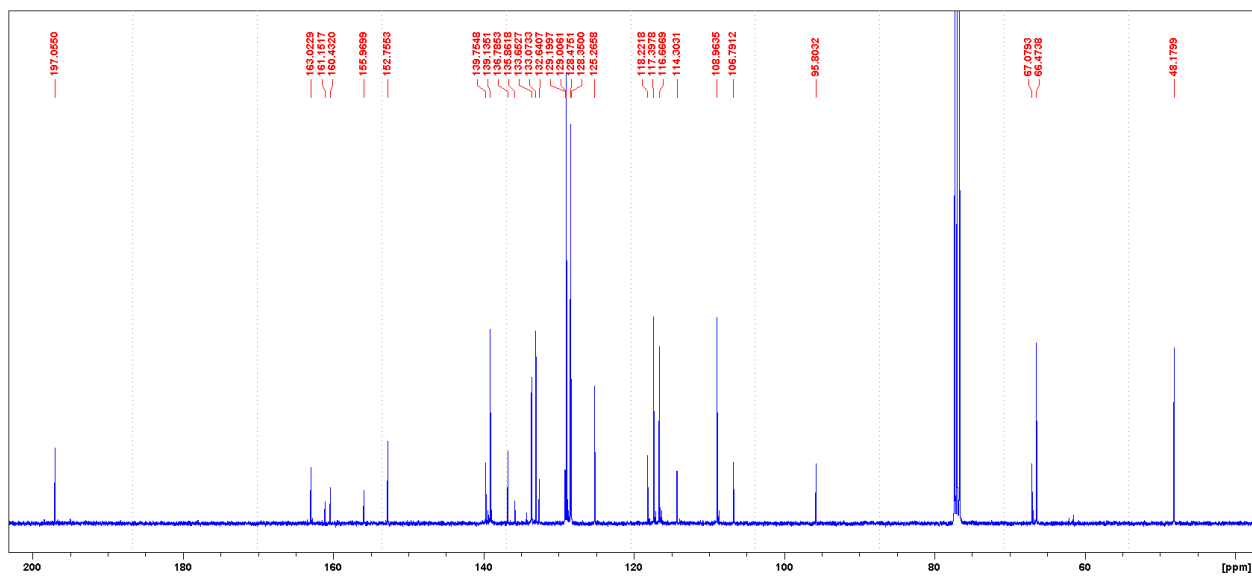

2-Benzoylmethyl-6-(2-propynyloxy)pyridine (7j) (CDCl<sub>3</sub>)

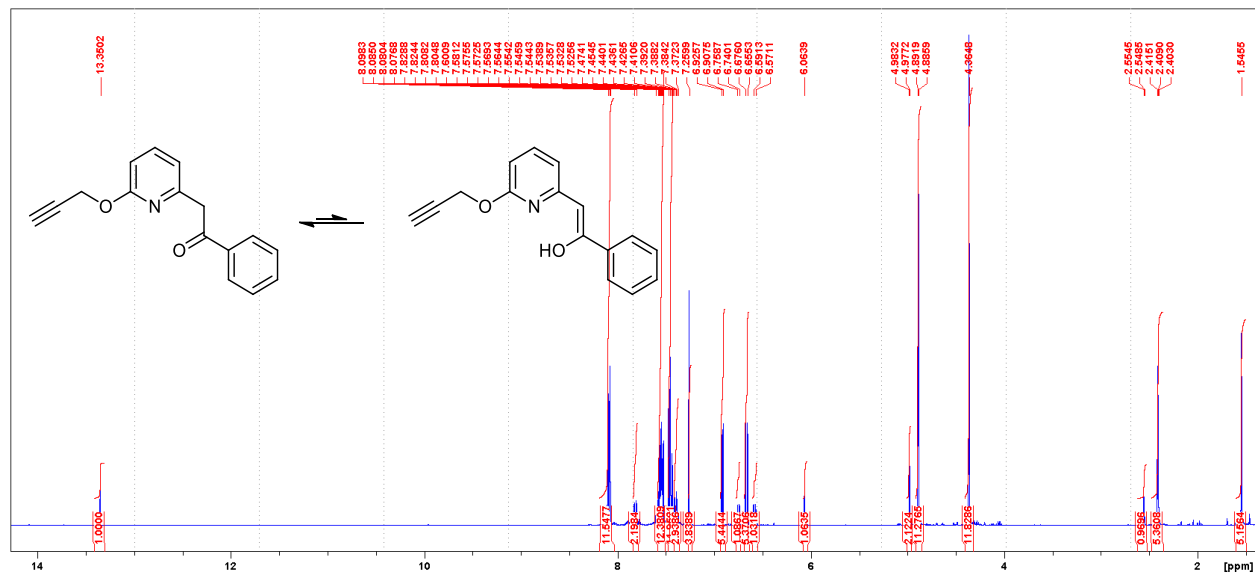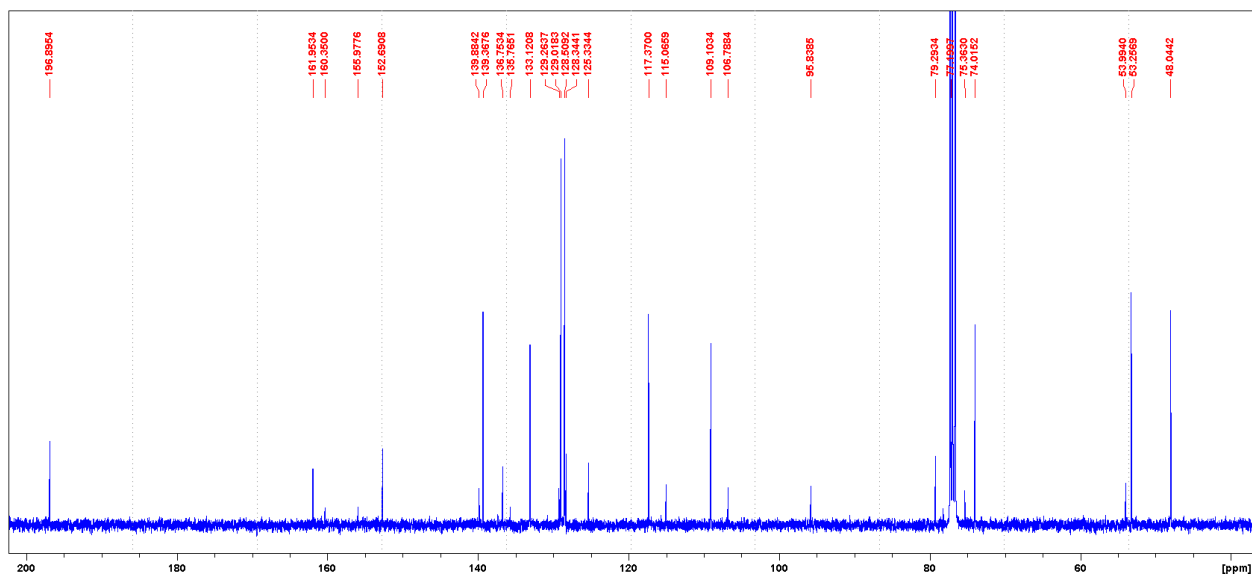

2-Benzoylmethyl-6-hydroxypyridine (7k) (CDCl<sub>3</sub>)

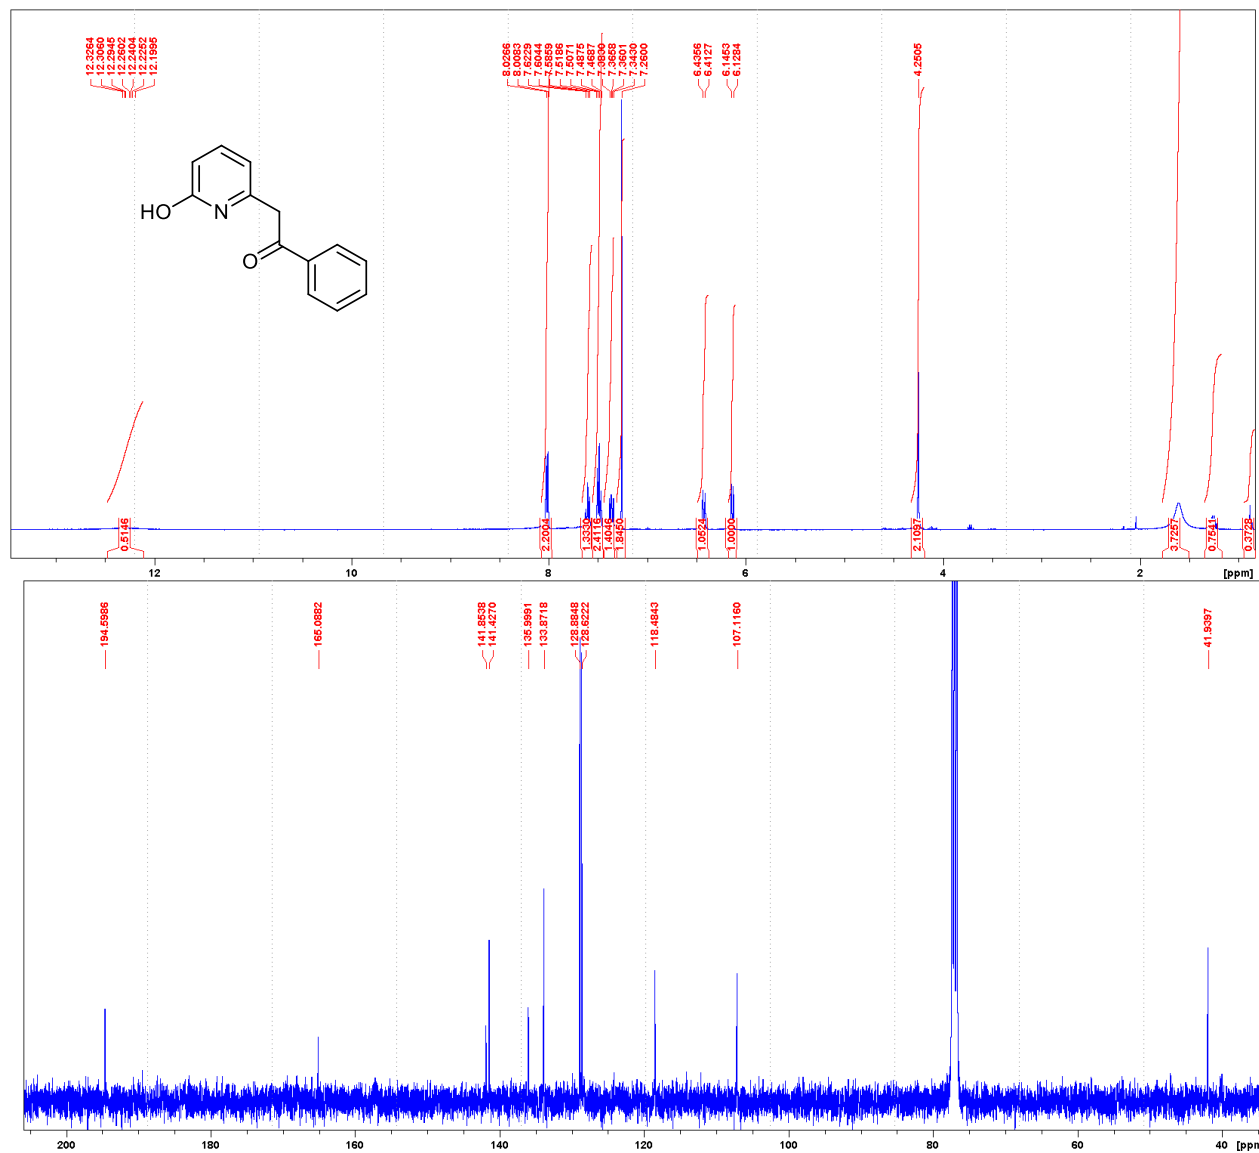

2-Benzoylmethyl-6-hydroxypyridine (7k) (CDCl<sub>3</sub>)

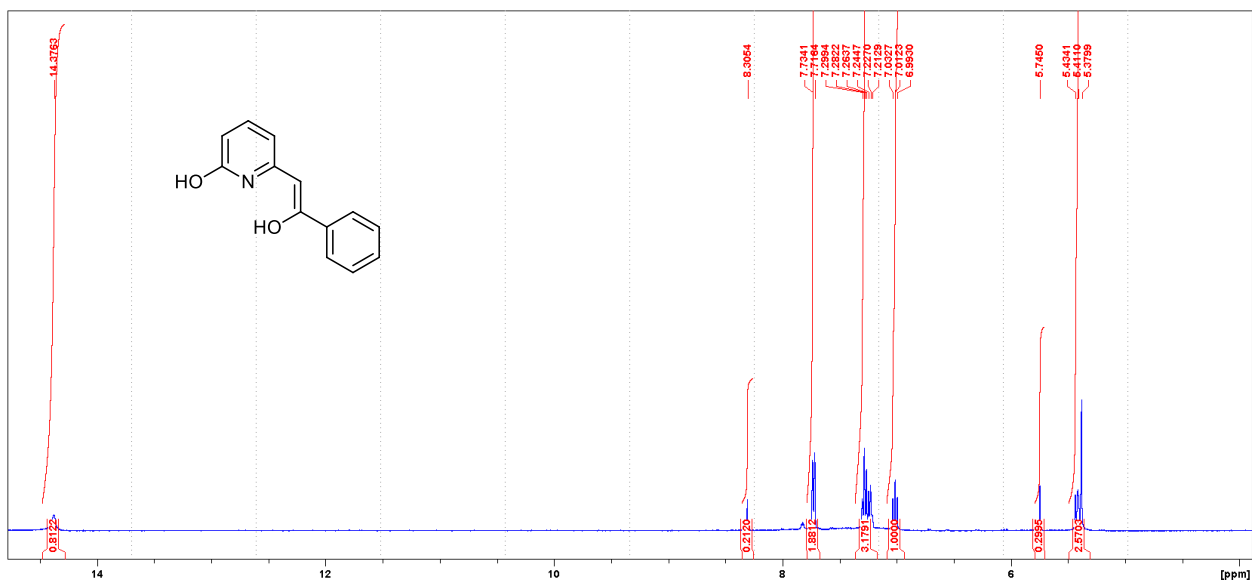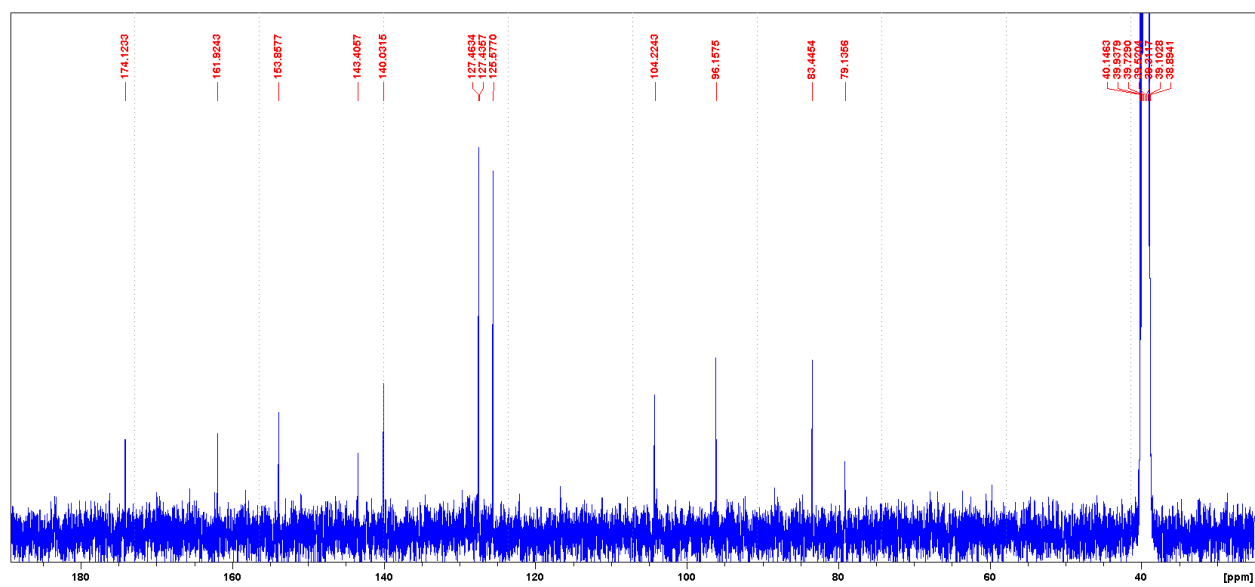

2-Methoxy-6-(2-oxo-1-hexyl)pyridine (7I) (CDCl<sub>3</sub>)

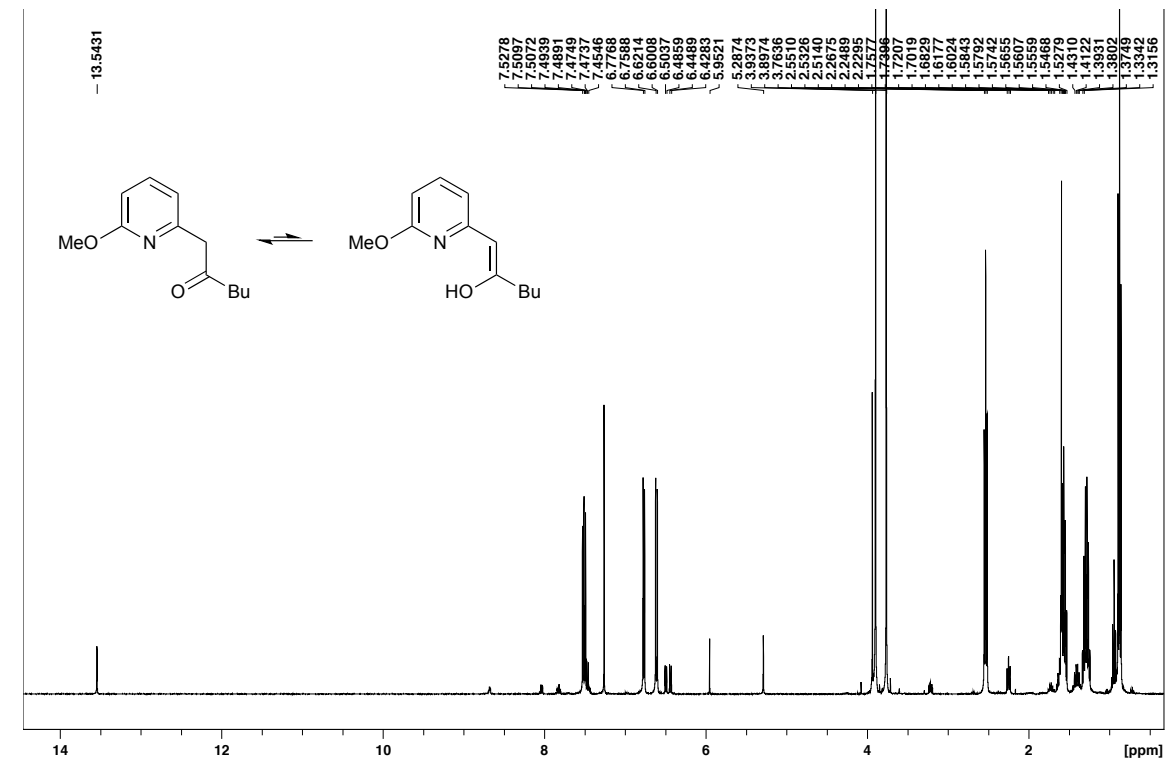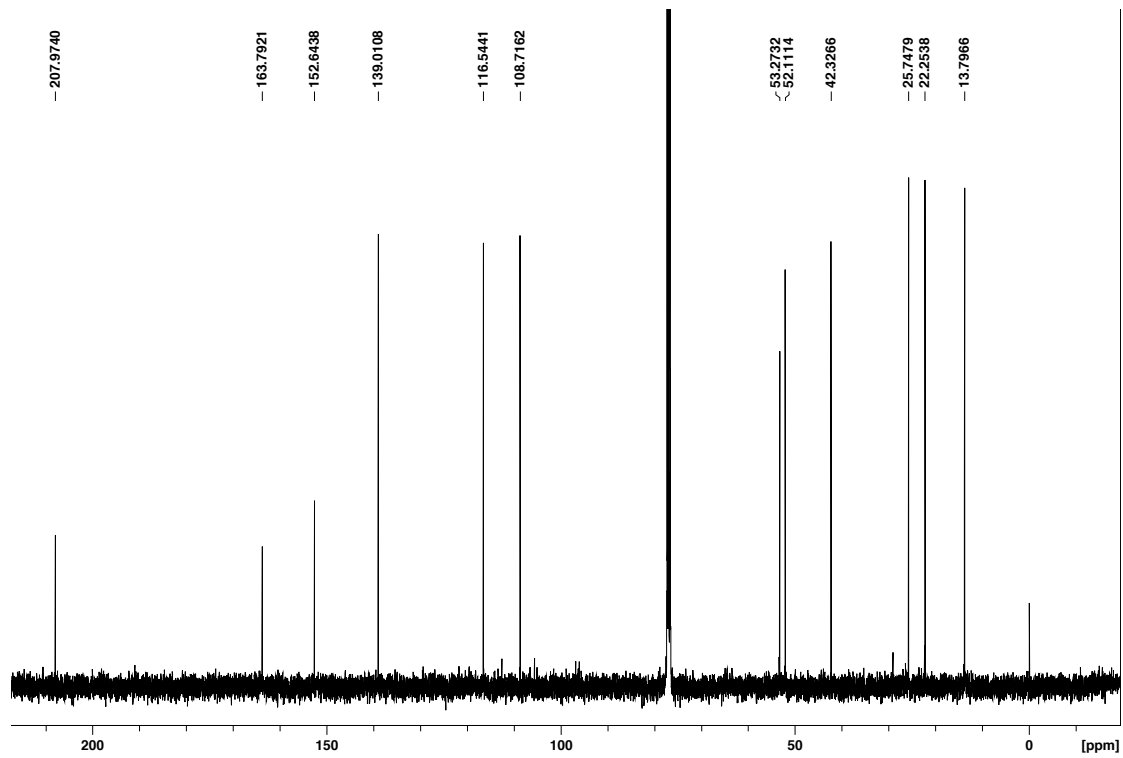

6-Benzoylmethyl-2-ethanoylaminopyridine (9a) (CDCl<sub>3</sub>)

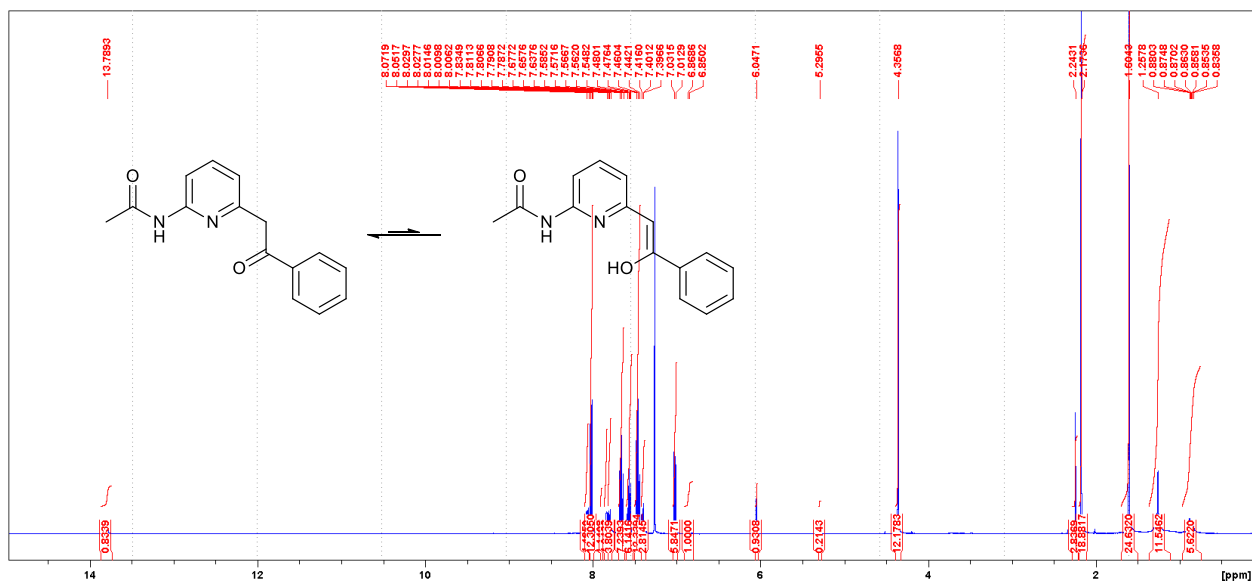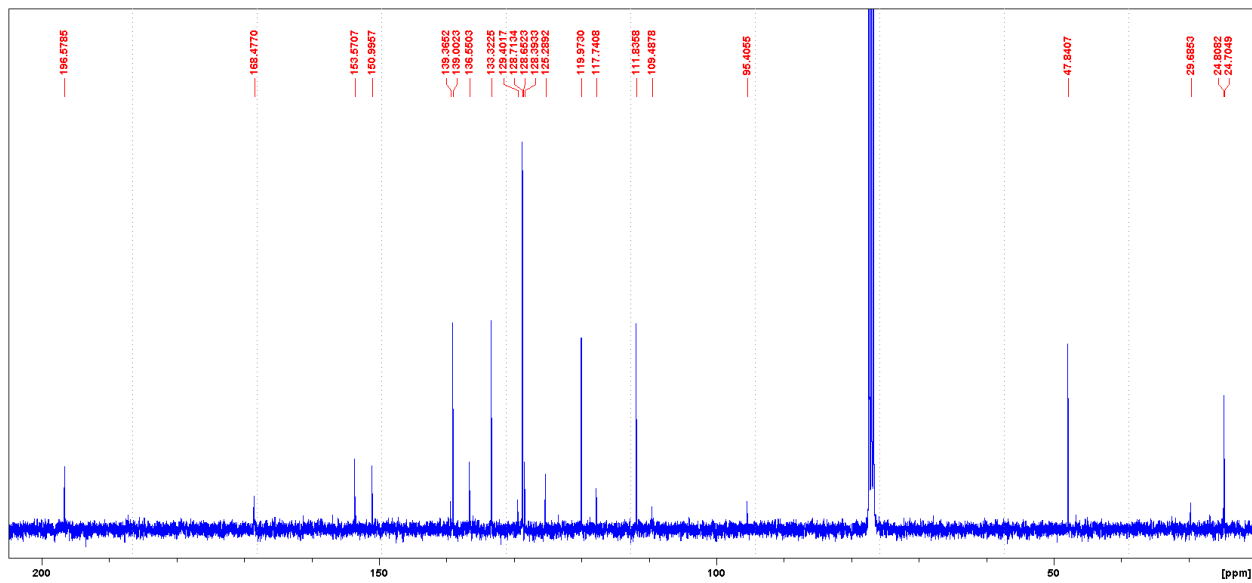





2-Benzoylmethyl-6-(2-methylpropanoyl)aminopyridine (9c) (CDCl<sub>3</sub>)

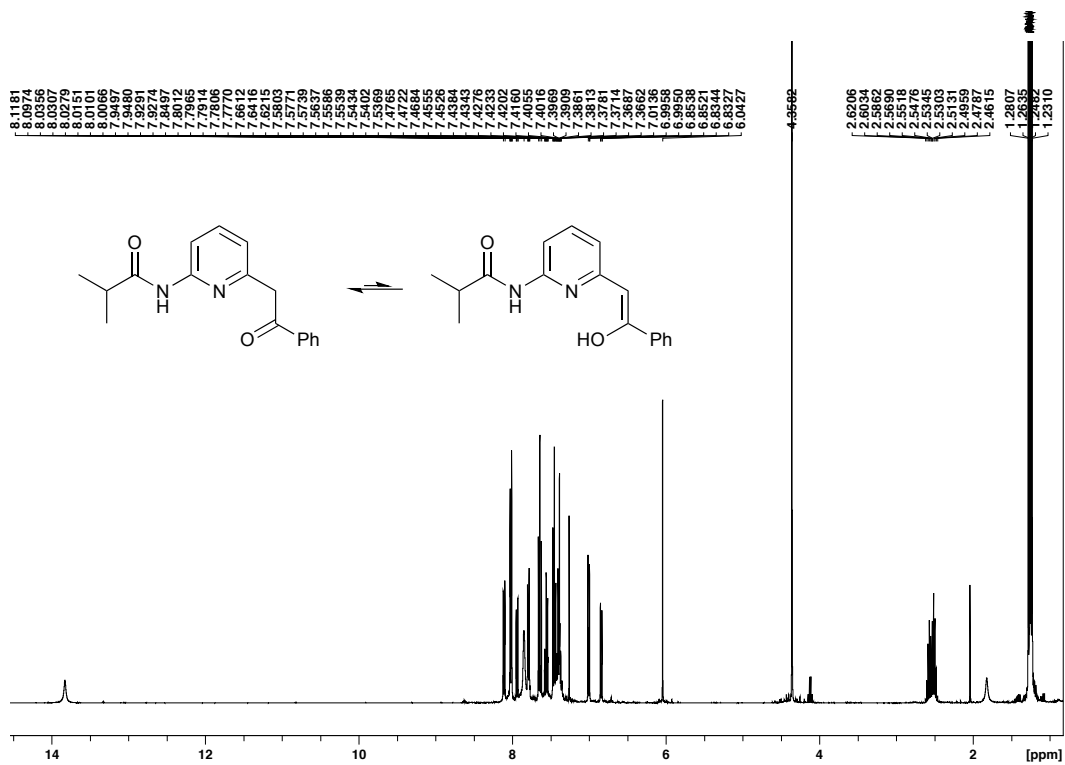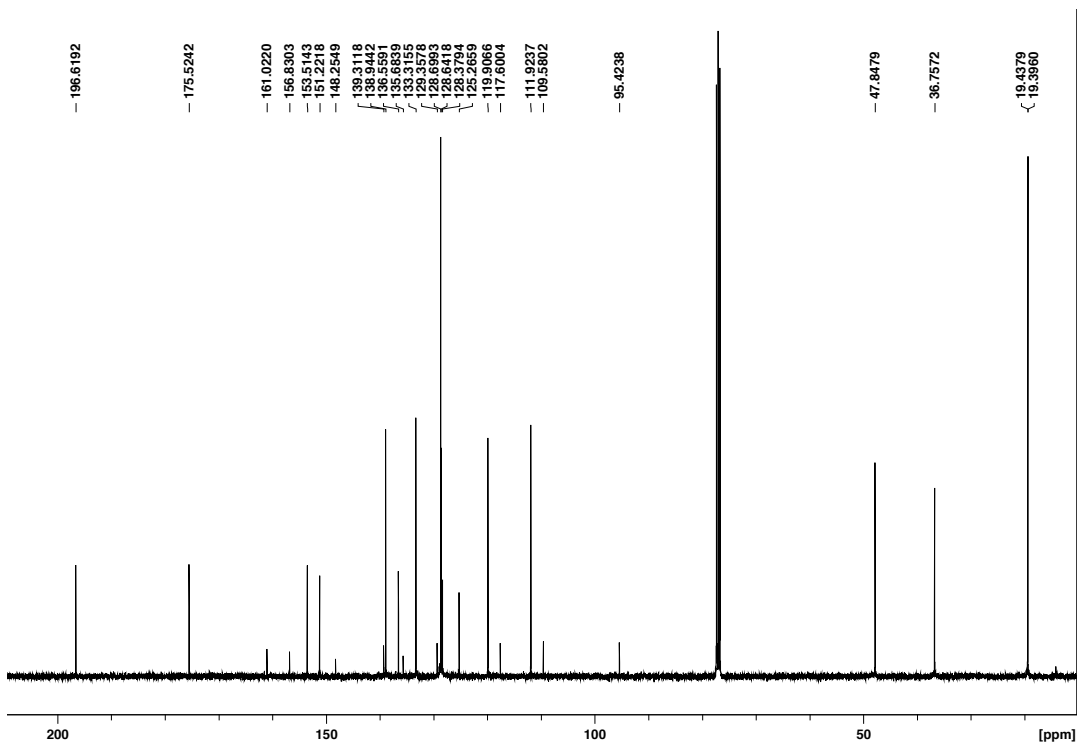

2-Benzoylmethyl-6-propenylaminopyridine (9d) (CDCl<sub>3</sub>)

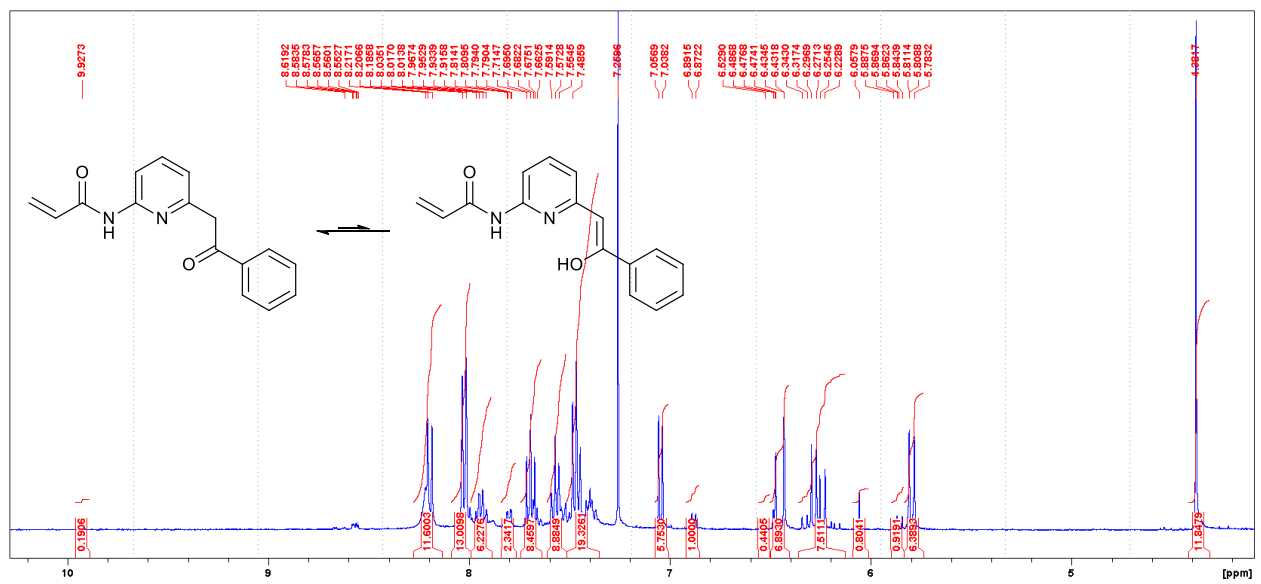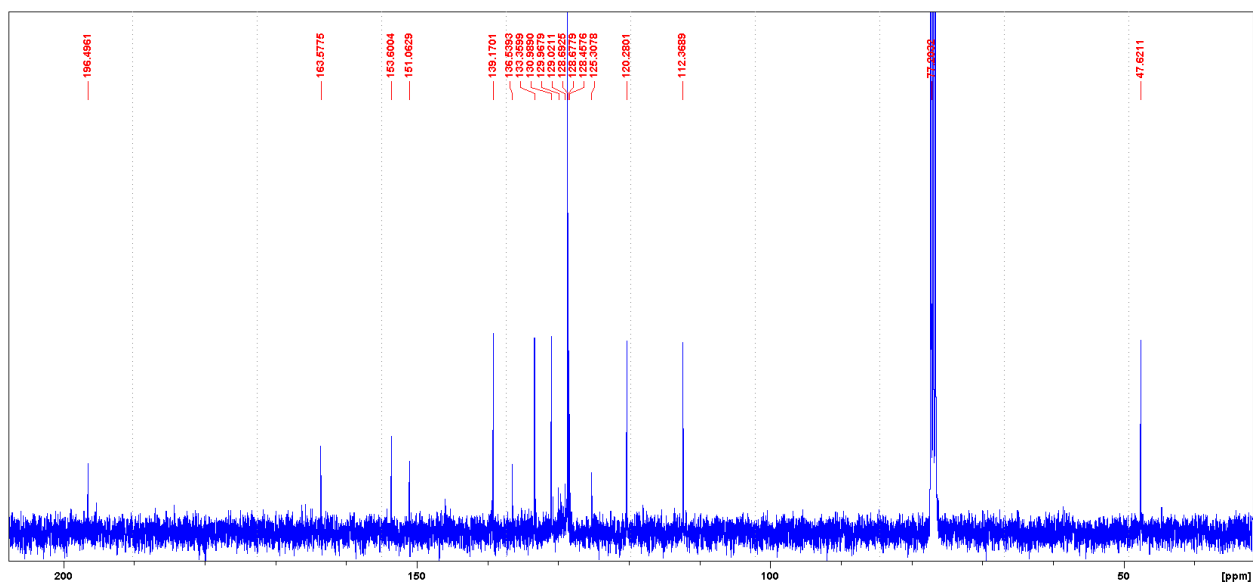

2-Benzoylmethyl-6-phenylethanopyridine (9e) (CDCl<sub>3</sub>)

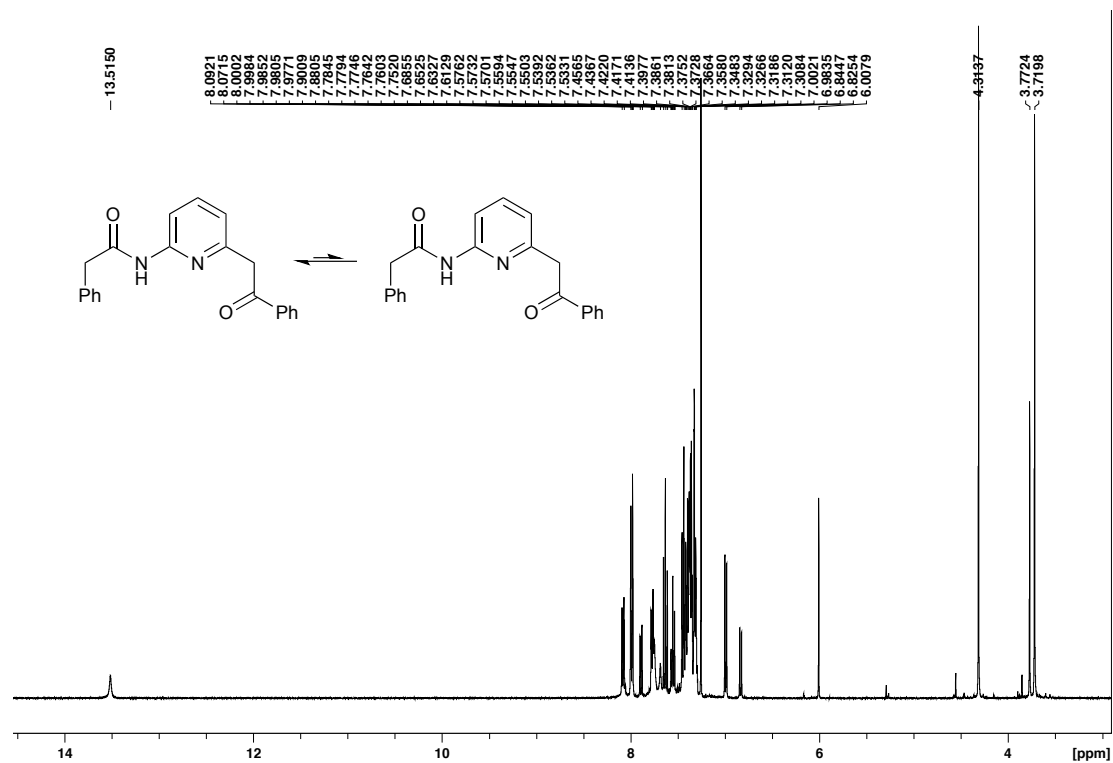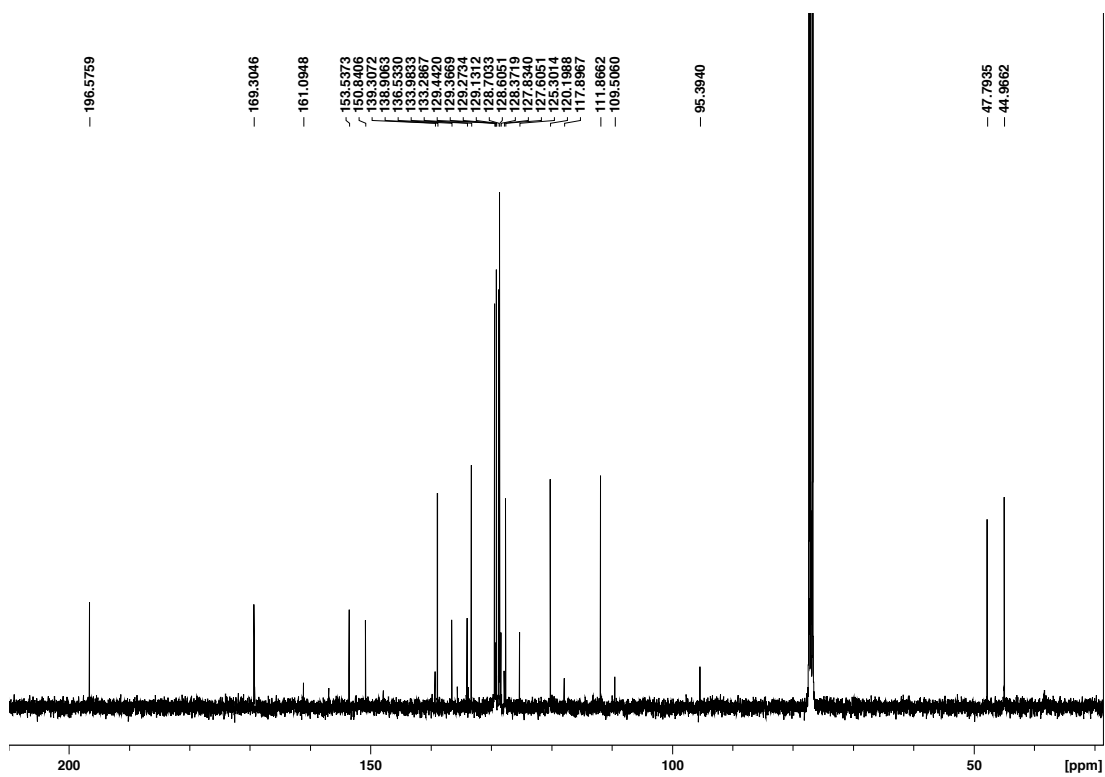



6-Isopropoxy-2-(1,2-dioxo-2-phenylethyl)pyridine (11a) (CDCl<sub>3</sub>)

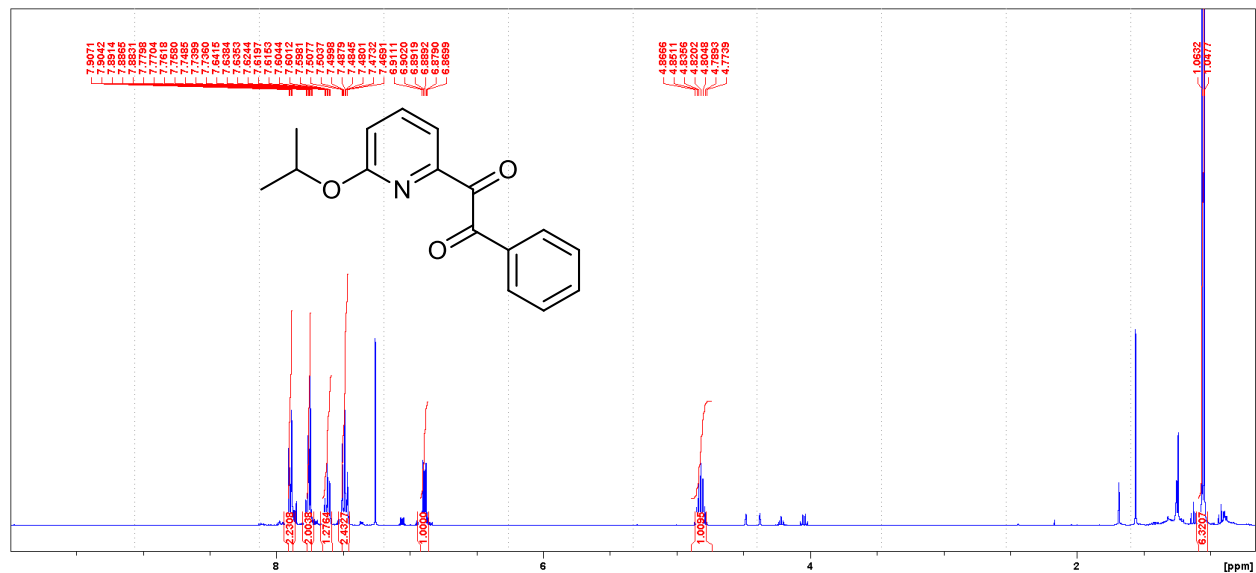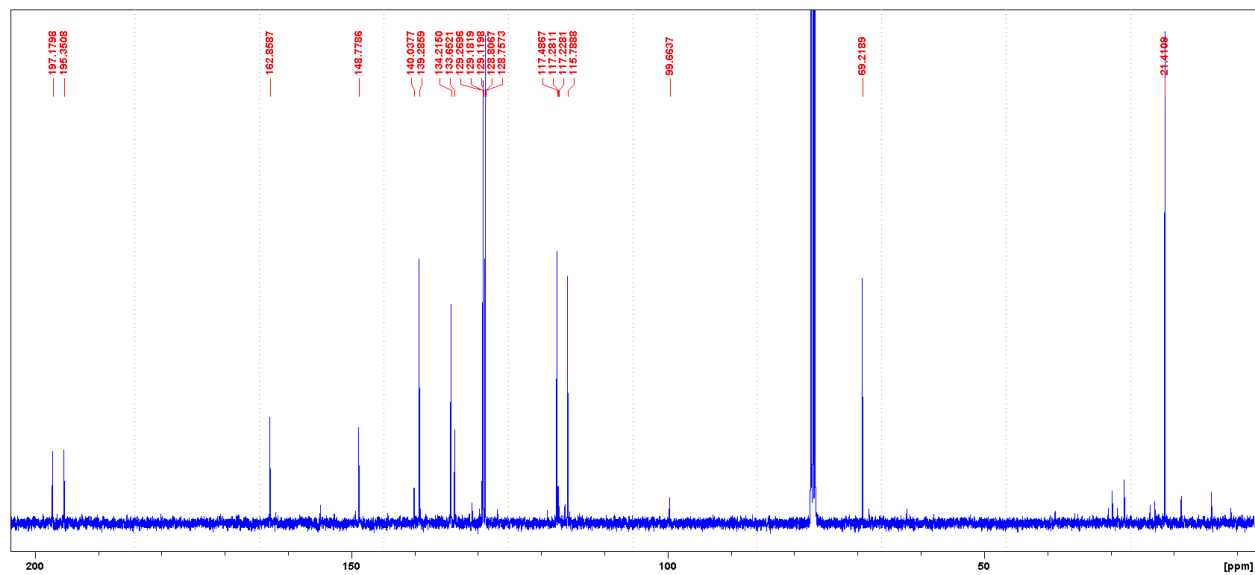

6-Methoxy-2-(1,2-dioxo-2-phenylethyl)pyridine (11b) (CDCl<sub>3</sub>)

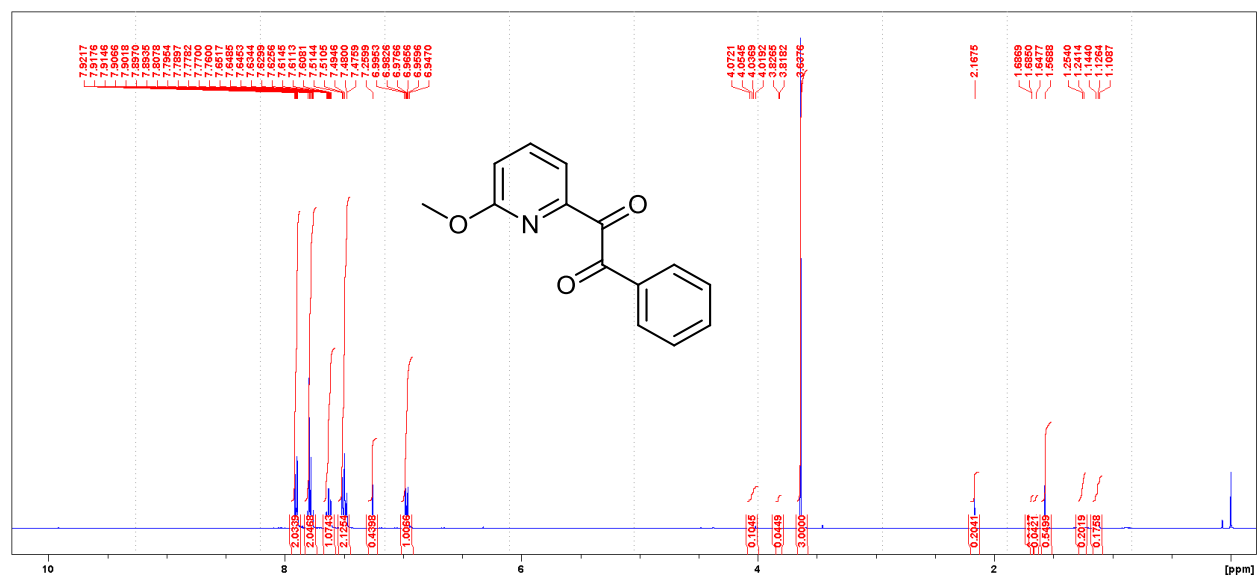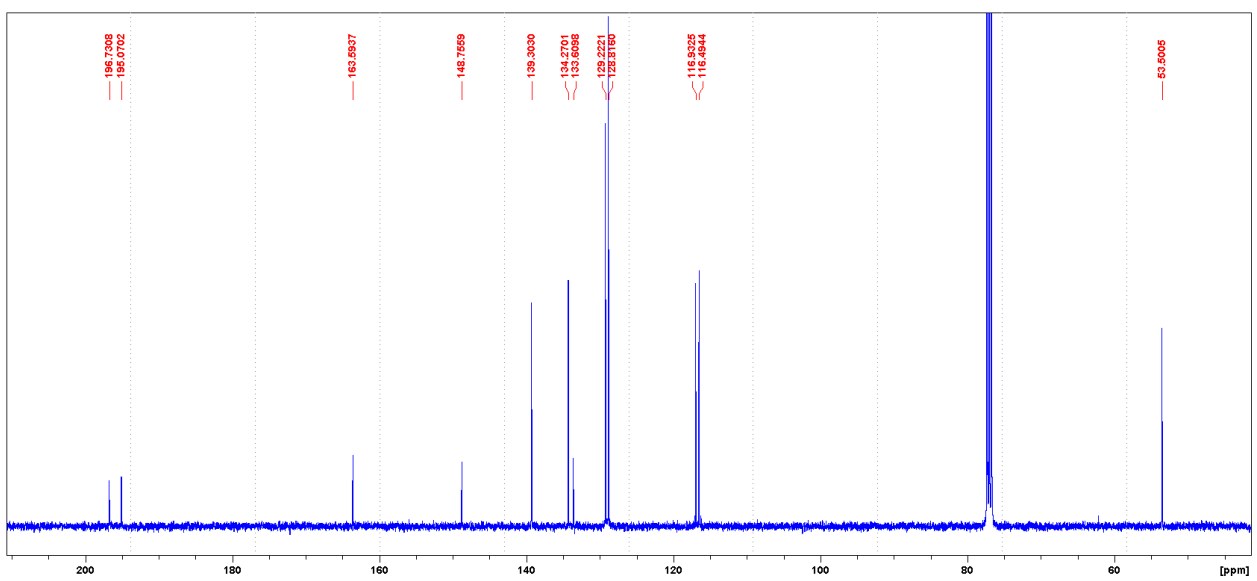

6-Ethanoylamino-2-(1,2-dioxo-2-phenylethyl)pyridine (14) (CDCl<sub>3</sub>)

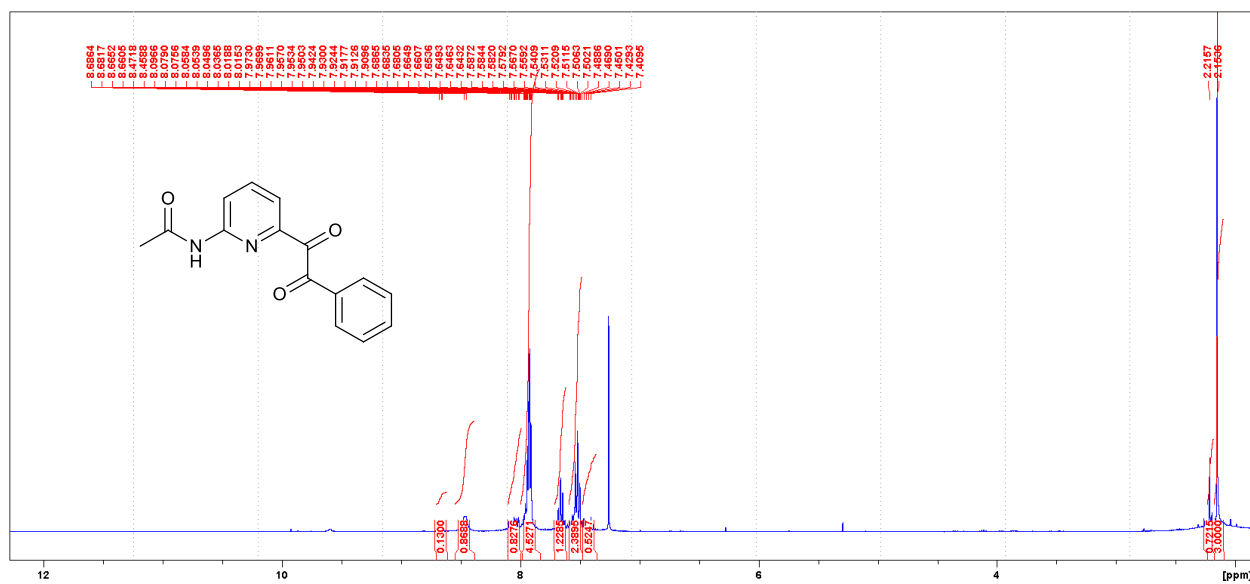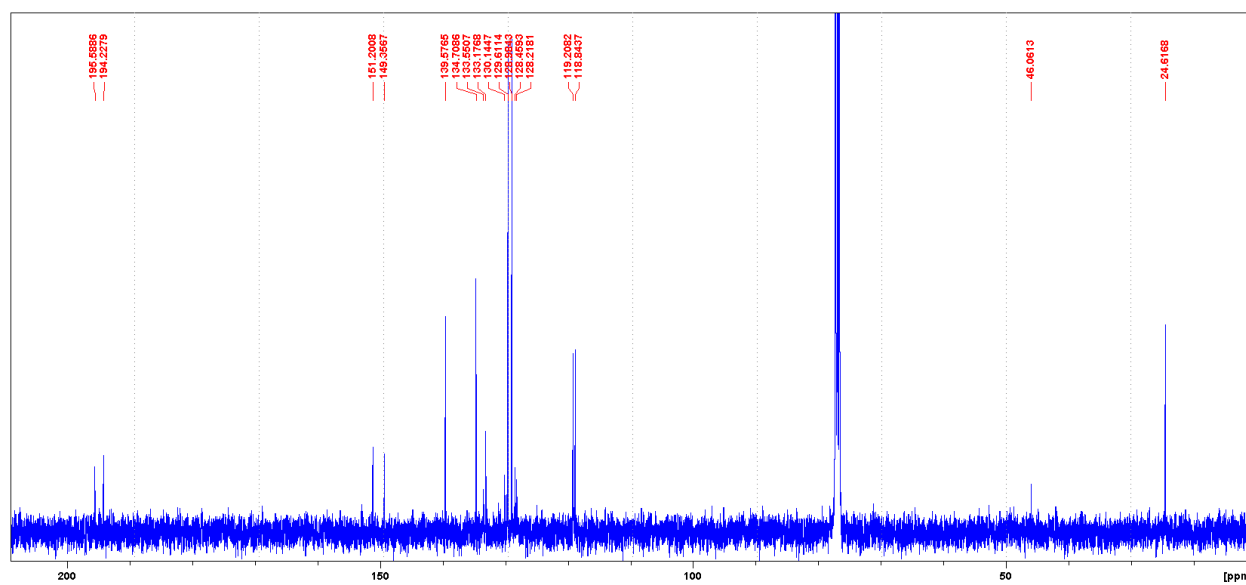

Supplement: c6ob01942k1.pdf [file c6ob01942k1.pdf]
